# Supplementary material
Source: publisher figshare collection journal article supplement (https://tandf.figshare.com/ndownloader/files/14515715)
Supplement: Supplementary file 1 [file 14515715]

**Supplementary Table S1**. Identification of diseases using International Classification of Diseases (ICD)-10 and/or Anatomical Therapeutic Chemical (ATC) Classification System codes.

| **Classification system** | **ICD-10 codes** | **ATC codes** |
| --- | --- | --- |
| ***Diseases of interest*** | | |
| Diabetes mellitus | E10, E11 | A10C, A10D, A10H0, A10J, A10K, A10L, A10N1, A10N3, A10N9, A10M1, A10M9, A10P1, A10S0, A10X9 |
| Dyslipidemia | E78 |  |
| Gout/Hyperuricemia | E79, M10 |  |
| Renal diseases | I12, N08, N18–19; N26, N28 |  |
| Heart disease | I11, I20-25, I47-50, I51.7 |  |
| Cerebrovascular disease | G45, I60-63, I67-68 |  |
